# Supplementary material for: Decreased Temperature Sensitivity of Vestigial Gene Expression in Temperate Populations of Drosophila melanogaster
Source: PubMed Central journal article supplement (PMC6679080; doi:10.3390/genes10070498), 2019-06-28
Supplement: genes-10-00498-s001.pdf [file genes-10-00498-s001.pdf]

## Supplementary Materials

**Table S1.** Primer sequences

| Gene            | Forward primer sequence | Reverse primer sequence  |
|-----------------|-------------------------|--------------------------|
| <i>vg</i>       | GCGCCCTCAACTACAACAACAAG | GGTGCCATACAAGTCGCTAACCTG |
| <i>Aats-asp</i> | GCCAAGCACCATGGCATTGATAC | ACATCCATAGCGGAAGGACTCG   |
| <i>RpS20</i>    | TTCGCATCACCACCCGTAAGAC  | TTGTGGATTCTCATCTGGAAGCG  |
| <i>RpL32</i>    | ATCGTGAAGAAGCGCACCAAGC  | TTGCGCCATTTGTGCGACAG     |

**Table S2.** Analysis of variance for effects of rearing temperature and climate of origin on *vg* expression including only temperate populations

|                                         | X <sup>2</sup> | df | P           |
|-----------------------------------------|----------------|----|-------------|
| Adult – model with interaction:         |                |    |             |
| (Intercept)                             | 25.5708        | 1  | < 0.001***  |
| Rearing temperature                     | 7.9145         | 1  | 0.004904 ** |
| Climate of origin                       | 0.9002         | 1  | 0.342728    |
| Rearing temperature x climate of origin | 0.2567         | 1  | 0.612424    |
| Adult – model without interaction:      |                |    |             |
| (Intercept)                             | 72.2112        | 1  | < 0.001***  |
| Rearing temperature                     | 44.0250        | 1  | < 0.001***  |
| Climate of origin                       | 8.6939         | 1  | 0.003193 ** |

Significance of fixed effects was estimated using Type III Wald Chi-square tests. \*\* $P < 0.01$ , \*\*\* $P < 0.001$ ;

Two climates of origin were considered in the analysis: cold-temperate and warm-temperate.

**Table S3.** Fold-changes in gene expression between population samples in adult *D. melanogaster*

| Gene            | Gene expression ratio between population samples |                     |         |
|-----------------|--------------------------------------------------|---------------------|---------|
|                 | Population samples                               | Rearing temperature |         |
|                 |                                                  | 17°C                | 28°C    |
| <i>vg</i>       | Sweden (SU)/The Netherlands (NL)                 | 1.69                | 1.75*   |
|                 | Sweden (SU)/France (FR)                          | 2.35**              | 3.04**  |
|                 | Sweden (SU)/Rwanda (RG)                          | 2.03*               | 2.16**  |
|                 | Sweden (SU)/Zimbabwe (ZK)                        | 0.82                | 1.41    |
|                 | Sweden (SU)/Zambia (ZI)                          | 0.85                | 1.78*** |
|                 | The Netherlands (NL)/France (FR)                 | 1.39                | 1.75*   |
|                 | The Netherlands (NL)/Rwanda (RG)                 | 1.20                | 1.24    |
|                 | The Netherlands (NL)/Zimbabwe (ZK)               | 0.49                | 0.81    |
|                 | The Netherlands (NL)/Zambia (ZI)                 | 0.50                | 1.02    |
|                 | France (FR)/Rwanda (RG)                          | 0.86                | 0.71    |
|                 | France (FR)/Zimbabwe (ZK)                        | 0.35**              | 0.65**  |
|                 | France (FR)/Zambia (ZI)                          | 0.36**              | 0.59*   |
|                 | Rwanda (RG)/Zimbabwe (ZK)                        | 0.41**              | 0.65**  |
|                 | Rwanda (RG)/Zambia (ZI)                          | 0.42**              | 0.82    |
|                 | Zimbabwe (ZK)/Zambia (ZI)                        | 1.04                | 0.79    |
| <i>Aats-asp</i> | Sweden (SU)/The Netherlands (NL)                 | 0.69*               | 0.92    |
|                 | Sweden (SU)/France (FR)                          | 0.96                | 0.76    |
|                 | Sweden (SU)/Rwanda (RG)                          | 0.88                | 0.70    |
|                 | Sweden (SU)/Zimbabwe (ZK)                        | 0.90                | 0.91    |
|                 | Sweden (SU)/Zambia (ZI)                          | 0.87                | 0.76    |
|                 | The Netherlands (NL)/France (FR)                 | 1.39                | 0.83    |
|                 | The Netherlands (NL)/Rwanda (RG)                 | 1.26                | 0.77    |
|                 | The Netherlands (NL)/Zimbabwe (ZK)               | 1.29                | 0.99    |
|                 | The Netherlands (NL)/Zambia (ZI)                 | 1.25                | 0.83    |
|                 | France (FR)/Rwanda (RG)                          | 0.91                | 0.93    |
|                 | France (FR)/Zimbabwe (ZK)                        | 0.93                | 1.20    |
|                 | France (FR)/Zambia (ZI)                          | 0.90                | 1.00    |
|                 | Rwanda (RG)/Zimbabwe (ZK)                        | 1.02                | 1.29    |
|                 | Rwanda (RG)/Zambia (ZI)                          | 0.99                | 1.08    |
|                 | Zimbabwe (ZK)/Zambia (ZI)                        | 1.03                | 1.20    |

Statistical testing included t-tests and correction for multiple testing. \* $P < 0.05$ , \*\* $P < 0.01$ , \*\*\* $P < 0.001$  (FDR=0.05).

**Table S4.** Fold-changes in gene expression at different rearing temperatures between tissues in third instar larvae

| Gene            | Rearing temperature | Gene expression ratio wing disc/brain |                      |               |             |
|-----------------|---------------------|---------------------------------------|----------------------|---------------|-------------|
|                 |                     | Sweden (SU)                           | The Netherlands (NL) | Zimbabwe (ZK) | Zambia (ZI) |
| <i>vg</i>       | 17°C                | 11.77***                              | 10.53**              | 13.19***      | 14.64**     |
|                 | 28°C                | 8.45***                               | 12.71**              | 8.59***       | 12.35***    |
| <i>Aats-asp</i> | 17°C                | 1.10                                  | 0.99                 | 1.10          | 1.32        |
|                 | 28°C                | 1.04                                  | 1.13                 | 1.20          | 1.23        |

Statistical testing included t-tests and correction for multiple testing. \*\* $P < 0.01$ , \*\*\* $P < 0.001$  (FDR=0.05).

**Table S5.** Fold-changes in tissue-specific gene expression between rearing temperatures in third instar larvae

| Gene            | Tissue    | Gene expression ratio 17°C/28°C |                      |               |             |
|-----------------|-----------|---------------------------------|----------------------|---------------|-------------|
|                 |           | Sweden (SU)                     | The Netherlands (NL) | Zimbabwe (ZK) | Zambia (ZI) |
| <i>vg</i>       | Wing disc | 1.02                            | 0.71                 | 1.29          | 0.59*       |
|                 | Brain     | 0.73                            | 0.85                 | 0.84          | 0.50*       |
| <i>Aats-asp</i> | Wing disc | 0.95                            | 0.87                 | 0.99          | 0.88        |
|                 | Brain     | 0.90                            | 0.99                 | 1.07          | 0.81        |

Statistical testing included t-tests and correction for multiple testing. \* $P < 0.05$  (FDR=0.05).

**Table S6.** Fold-changes in tissue-specific gene expression between population samples in third instar larvae

| Gene                               | Tissue                             | Gene expression ratio between population samples |                     |                                  |      |      |
|------------------------------------|------------------------------------|--------------------------------------------------|---------------------|----------------------------------|------|------|
|                                    |                                    | Population samples                               | Rearing temperature |                                  |      |      |
|                                    |                                    |                                                  | 17°C                | 28°C                             |      |      |
| <i>vg</i>                          | Wing disc                          | Sweden (SU)/The Netherlands (NL)                 | 0.86                | 0.60                             |      |      |
|                                    |                                    | Sweden (SU)/Zimbabwe (ZK)                        | 0.75                | 0.74                             |      |      |
|                                    |                                    | Sweden (SU)/Zambia (ZI)                          | 1.35                | 0.78                             |      |      |
|                                    |                                    | The Netherlands (NL)/Zimbabwe (ZK)               | 0.87                | 1.59                             |      |      |
|                                    |                                    | The Netherlands (NL)/Zambia (ZI)                 | 1.56                | 1.30                             |      |      |
|                                    |                                    | Zimbabwe (ZK)/Zambia (ZI)                        | 1.79*               | 0.82                             |      |      |
|                                    | Brain                              | Sweden (SU)/The Netherlands (NL)                 | 0.77                | 1.14                             |      |      |
|                                    |                                    | Sweden (SU)/Zimbabwe (ZK)                        | 0.84                | 0.90                             |      |      |
|                                    |                                    | Sweden (SU)/Zambia (ZI)                          | 1.67                | 0.97                             |      |      |
|                                    |                                    | The Netherlands (NL)/Zimbabwe (ZK)               | 1.09                | 1.07                             |      |      |
|                                    |                                    | The Netherlands (NL)/Zambia (ZI)                 | 2.17*               | 1.27                             |      |      |
|                                    |                                    | Zimbabwe (ZK)/Zambia (ZI)                        | 1.99                | 1.18                             |      |      |
|                                    |                                    | <i>Aats-asp</i>                                  | Wing disc           | Sweden (SU)/The Netherlands (NL) | 0.94 | 0.86 |
|                                    |                                    |                                                  |                     | Sweden (SU)/Zimbabwe (ZK)        | 0.84 | 0.87 |
| Sweden (SU)/Zambia (ZI)            | 1.06                               |                                                  |                     | 0.97                             |      |      |
| The Netherlands (NL)/Zimbabwe (ZK) | 0.90                               |                                                  |                     | 1.01                             |      |      |
| The Netherlands (NL)/Zambia (ZI)   | 1.13                               |                                                  |                     | 1.13                             |      |      |
| Zimbabwe (ZK)/Zambia (ZI)          | 1.26                               |                                                  |                     | 1.12                             |      |      |
| Brain                              | Sweden (SU)/The Netherlands (NL)   |                                                  | 0.85                | 0.93                             |      |      |
|                                    | Sweden (SU)/Zimbabwe (ZK)          |                                                  | 0.84                | 1.00                             |      |      |
|                                    | Sweden (SU)/Zambia (ZI)            |                                                  | 1.27                | 1.14                             |      |      |
|                                    | The Netherlands (NL)/Zimbabwe (ZK) |                                                  | 1.00                | 1.08                             |      |      |
|                                    |                                    | The Netherlands (NL)/Zambia (ZI)                 | 1.50                | 1.23                             |      |      |
|                                    |                                    | Zimbabwe (ZK)/Zambia (ZI)                        | 1.51*               | 1.15                             |      |      |

Statistical testing included t-tests and correction for multiple testing. \* $P < 0.05$  (FDR=0.05).

**Table S7.** Candidate SNPs

| Populations                       | Genomic position |
|-----------------------------------|------------------|
| Sweden                            | 2R: 12894323     |
|                                   | 2R: 12894933     |
| Sweden - The Netherlands - France | 2R:12896107      |
|                                   | 2R:12896108      |
|                                   | 2R:12896238      |
|                                   | 2R:12897506      |
|                                   | 2R:12897508      |
|                                   | 2R:12897618      |
|                                   | 2R:12897665      |
|                                   | 2R:12910816      |
| Rwanda                            | 2R:12911672      |
|                                   | 2R:12892106      |
|                                   | 2R:12913210      |
|                                   | 2R:12913330      |

Genomic positions are given according to FlyBase release 6 [1].

## References

1. Thurmond, J.; Goodman, J.L.; Strelets, V.B.; Attrill, H.; Gramates, L.S.; Marygold, S.J.; Matthews, B.B.; Millburn, G.; Antonazzo, G.; Trovisco, V.; et al. FlyBase 2.0: the next generation. *Nucleic Acids Res.* 2019, 47, D759–D765.
